# Supplementary material
Source: MDPI journal article supplement (https://www.mdpi.com/2073-4441/12/6/1755)
Supplement: s1 [file s1]

# Phycoremediation of Landfill Leachate with *Desmodesmus subspicatus*: A Pre-Treatment for Reverse Osmosis

Marina Kholomyeva \*, Radek Vurm, Lucia Tajnaiová, Marek Šír, Mariya Maslova and Vladimír Kočí \*

## Supplementary Materials

### 1. Statistical Analyses

#### 1.1. Analysis of Correlation

**Table S1.** Correlation matrices for the assessment of correlation between the initial parameters and dilutions of the LL and pollutant removal. The tested means: remaining TAN concentration (PAR 1); remaining Fe concentration (PAR 2); initial TAN concentration (PAR 3); and initial Fe concentration (PAR 4). For each pair the *r*-value was determined.

|      | PAR1    | 10%<br>PAR2 | PAR3    | PAR4    |
|------|---------|-------------|---------|---------|
| PAR1 | 1       | −0.0736     | 0.994   | −0.1714 |
| PAR2 | −0.0736 | 1           | −0.1406 | 0.9837  |
| PAR3 | 0.9940  | −0.1406     | 1       | −0.2298 |
| PAR4 | −0.1714 | 0.9837      | −0.2298 | 1       |

  

|      | PAR1    | 20%<br>PAR2 | PAR3    | PAR4    |
|------|---------|-------------|---------|---------|
| PAR1 | 1       | −0.0998     | 0.9954  | −0.1743 |
| PAR2 | −0.0998 | 1           | −0.1624 | 0.9869  |
| PAR3 | 0.9954  | −0.1624     | 1       | −0.2298 |
| PAR4 | −0.1743 | 0.9869      | −0.2298 | 1       |

  

|      | PAR1    | 30%<br>PAR2 | PAR3    | PAR4    |
|------|---------|-------------|---------|---------|
| PAR1 | 1       | −0.1574     | 0.9902  | −0.179  |
| PAR2 | −0.1574 | 1           | −0.2107 | 0.9984  |
| PAR3 | 0.9902  | −0.2107     | 1       | −0.2298 |
| PAR4 | −0.179  | 0.9984      | −0.2298 | 1       |

**Table S2.** Test of correlations between the biomass concentration and Fe/TAN removal efficiency.

| Pollutant | <i>r</i> -value |
|-----------|-----------------|
| TAN       | 0.79            |
| Fe        | 0.81            |

#### 1.2. One-Way Analysis of Variance (ANOVA) and Tukey–Kramer Multiple Comparison Test ( $p = 0.05$ )

**Table S3.** One-way analysis of variance for determination whether group mean differences exist in the values of remediation efficiency between the particular leachates and dilutions ( $p = 0.05$ ).

|             | Between Leachates | Between Dilutions |       |            |            |        |         |
|-------------|-------------------|-------------------|-------|------------|------------|--------|---------|
|             |                   | A                 | B     | C          | D          | E      | F       |
| Fe removal  | 4.6217E−16*       | /                 | 0.298 | /          | 8.7E−13 *  | 0.787  | 0.054   |
| TAN removal | 6.90774E−22*      | 0.282             | 0.094 | 8.14E−05 * | 9.62E−05 * | 0.2408 | 0.004 * |

<sup>a</sup> for the means with  $p$ -values followed by the “\*” sign, a subsequent Tukey–Kramer test was performed; <sup>b</sup> “/” sign indicates that the analysis of variance was not performed, because all group means had the same value.

**Table S4.** Tukey–Kramer multiple comparison test ( $p = 0.05$ ).

| Between Dilutions                     |     |       |         |        |         |         |       |        |     |     |        |        |
|---------------------------------------|-----|-------|---------|--------|---------|---------|-------|--------|-----|-----|--------|--------|
| TAN removal<br>( $F_{crit} =$         | C   |       |         |        | D       |         |       |        | F   |     |        |        |
|                                       |     | 10%   | 20%     | 50%    |         | 10%     | 20%   | 50%    |     | 10% | 20%    | 50%    |
|                                       | 10% | x     | 0.021   | 0.205* | 10%     | x       | 0.014 | 0.645* | 10% | x   | 0.153* | 0.449* |
|                                       | 20% | x     | x       | 0.226* | 20%     | x       | x     | 0.658* | 20% | x   | x      | 0.296* |
|                                       | 50% | x     | x       | x      | 50%     | x       | x     | x      | 50% | x   | x      | x      |
| Between Leachates                     |     |       |         |        |         |         |       |        |     |     |        |        |
| TAN removal<br>( $F_{crit} = 0.104$ ) |     | B     | C       | D      | E       | F       |       |        |     |     |        |        |
|                                       | A   | 0.463 | 0.372   | 0.134  | 0.540   | 0.499   |       |        |     |     |        |        |
|                                       | B   | x     | 0.090 * | 0.328  | 0.077 * | 0.036 * |       |        |     |     |        |        |
|                                       | C   | x     | x       | 0.238  | 0.168   | 0.126   |       |        |     |     |        |        |
|                                       | D   | x     | x       | x      | 0.406   | 0.365   |       |        |     |     |        |        |
|                                       | E   | x     | x       | x      | x       | 0.041 * |       |        |     |     |        |        |
|                                       | F   | x     | x       | x      | x       | x       |       |        |     |     |        |        |
| Fe removal<br>( $F_{crit} = 0.279$ )  |     | B     | C       | D      | E       | F       |       |        |     |     |        |        |
|                                       | A   | 0.773 | 0.000 * | 0.324  | 0.930   | 0.826   |       |        |     |     |        |        |
|                                       | B   | x     | 0.773   | 0.449  | 0.158 * | 0.053 * |       |        |     |     |        |        |
|                                       | C   | x     | x       | 0.324  | 0.930   | 0.826   |       |        |     |     |        |        |
|                                       | D   | x     | x       | x      | 0.607   | 0.502   |       |        |     |     |        |        |
|                                       | E   | x     | x       | x      | x       | 0.104 * |       |        |     |     |        |        |
|                                       | F   | x     | x       | x      | x       | x       |       |        |     |     |        |        |

To evaluate statistical significance, the mean absolute differences and a critical value were compared. Means followed by the “\*” sign differ by Tukey – Kramer test.

## 2. BBM Medium composition for Microalgae Cultivation

**Table S5.** BBM medium composition.

| Component                                            | Stock Solution<br>(to 1 litre dH <sub>2</sub> O) | Quantity Used<br>(to 1 litre) |
|------------------------------------------------------|--------------------------------------------------|-------------------------------|
| NaNO <sub>3</sub>                                    | 25.00 g                                          | 10 ml                         |
| CaCl <sub>2</sub> ·2H <sub>2</sub> O                 | 2.50 g                                           | 10 ml                         |
| MgSO <sub>4</sub> ·7H <sub>2</sub> O                 | 7.50 g                                           | 10 ml                         |
| K <sub>2</sub> HPO <sub>4</sub>                      | 7.50 g                                           | 10 ml                         |
| KH <sub>2</sub> PO <sub>4</sub>                      | 17.50 g                                          | 10 ml                         |
| NaCl                                                 | 2.50 g                                           | 10 ml                         |
| EDTA solution:                                       |                                                  |                               |
| EDTA                                                 | 50.00 g                                          | 1 ml                          |
| KOH                                                  | 31.00 g                                          |                               |
| Acidified iron solution                              |                                                  |                               |
| FeSO <sub>4</sub> ·7H <sub>2</sub> O                 | 4.98 g                                           | 1 ml                          |
| H <sub>2</sub> SO <sub>4</sub> (96%)                 | 1.00 ml                                          |                               |
| H <sub>3</sub> BO <sub>3</sub>                       | 11.42 g                                          | 1 ml                          |
| Trace metals solution                                |                                                  |                               |
| ZnSO <sub>4</sub> ·7H <sub>2</sub> O                 | 8.82 g                                           |                               |
| MnCl <sub>2</sub> ·4H <sub>2</sub> O                 | 1.44 g                                           |                               |
| MoO <sub>3</sub>                                     | 0.71 g                                           | 1 ml                          |
| CuSO <sub>4</sub> ·5H <sub>2</sub> O                 | 1.57 g                                           |                               |
| Co(NO <sub>3</sub> ) <sub>2</sub> ·6H <sub>2</sub> O | 0.49 g                                           |                               |
